# Supplementary material
Source: PubMed Central journal article supplement (PMC5744649)
Supplement: EHP1013.s001.acco.pdf [file EHP1013.s001.acco.pdf]

**Note to readers with disabilities:** *EHP* strives to ensure that all journal content is accessible to all readers. However, some figures and Supplemental Material published in *EHP* articles may not conform to [508 standards](#) due to the complexity of the information being presented. If you need assistance accessing journal content, please contact [ehponline@niehs.nih.gov](mailto:ehponline@niehs.nih.gov). Our staff will work with you to assess and meet your accessibility needs within 3 working days.

## **Supplemental Material**

# **Pesticide Exposure and Risk of Rheumatoid Arthritis among Licensed Male Pesticide Applicators in the Agricultural Health Study**

Armando Meyer, Dale P. Sandler, Laura E. Beane Freeman, Jonathan N. Hofmann, and Christine G. Parks

### **Table of Contents**

**Figure S1.** Identification of cases and controls

**Table S1.** Exposure-response relationship between intensity-weighted lifetime use of specific pesticides and incident RA among male licensed pesticide applicators in the Agricultural Health Study

**Table S2.** Ever use of specific pesticides and incident RA among smokers and non-smokers male licensed pesticide applicators in the Agricultural Health Study

**Table S3.** Ever use of specific pesticides and incident RA among male licensed pesticide applicators in the Agricultural Health Study, according to age

**Table S4.** Main characteristic of probable and possible RA cases and non-cases among male licensed private applicators in the Agricultural Health Study

**Table S5.** Ever use of specific pesticides associated with possible and probable incident RA among male licensed pesticide applicators in the Agricultural Health Study

**Figure S1 – Identification of cases and non-cases**

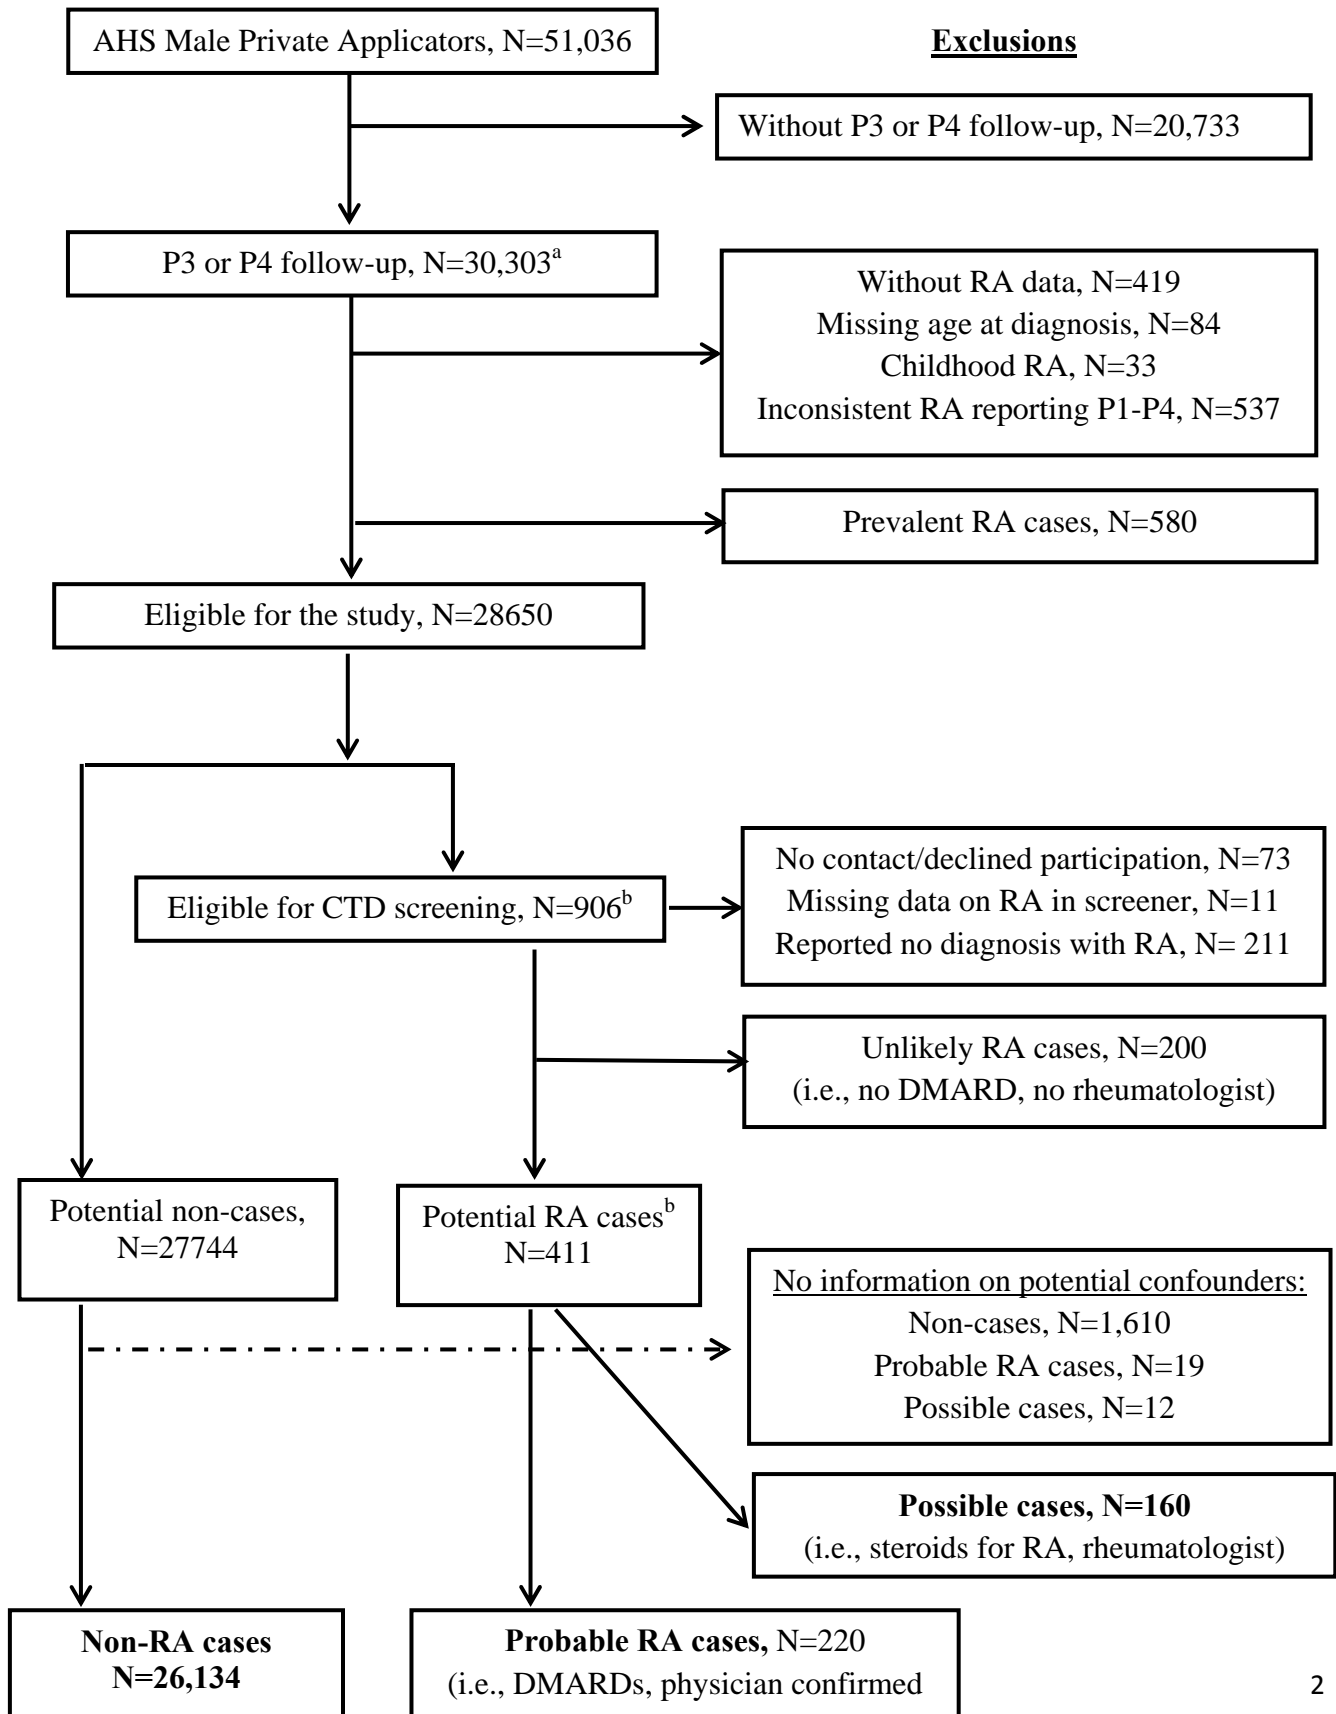

<sup>a</sup>Includes 25 self-reported cases of systemic autoimmune diseases (19 with RA) who were identified at enrollment, but lacked P3/P4 data. These were included because they were asked about RA in pilot validation study

<sup>b</sup>Includes 99 who were eligible to be screened for RA because they reported another systemic autoimmune disease (e.g., lupus); of these, 3 were identified as potential RA cases for the first time during screening

**Table S1 – Exposure-response relationship between intensity-weighted lifetime use of specific pesticides and incident RA among male licensed pesticide applicators in the Agricultural Health Study**

|                              | Non-cases<br>(N=26,134) | Incident RA cases<br>(N=220) |                         |
|------------------------------|-------------------------|------------------------------|-------------------------|
|                              | N (%)                   | N (%)                        | OR <sup>a</sup> (95%CI) |
| <b>INSECTICIDES</b>          |                         |                              |                         |
| <b>ORGANOCHLORINES</b>       |                         |                              |                         |
| <b>Aldrin</b>                |                         |                              |                         |
| Never                        | 11257 (83)              | 99 (78)                      | Reference               |
| T1                           | 1095 (8)                | 14 (11)                      | 1.38 (0.77,2.50)        |
| T2                           | 116 (1)                 | 2 (2)                        | 1.73 (0.41,7.23)        |
| T3                           | 1084 (8)                | 12 (10)                      | 1.18 (0.63,2.22)        |
| p-trend                      |                         |                              | 0.45                    |
| <b>Chlordane</b>             |                         |                              |                         |
| Never                        | 11035 (81)              | 93 (72)                      | Reference               |
| T1                           | 639 (5)                 | 8 (6)                        | 1.14 (0.54,2.38)        |
| T2                           | 1051 (8)                | 15 (12)                      | 1.41 (0.81,2.48)        |
| T3                           | 825 (6)                 | 13 (10)                      | 1.48 (0.81,2.69)        |
| p-trend                      |                         |                              | 0.11                    |
| <b>Toxaphene<sup>b</sup></b> |                         |                              |                         |
| Never                        | 12143 (89)              | 104 (83)                     | Reference               |
| T1                           | 859 (6)                 | 7 (6)                        | 0.82 (0.38,1.78)        |
| T2                           | 392 (3)                 | 9 (7)                        | 2.00 (0.99,4.04)        |
| T3                           | 202 (1)                 | 6 (5)                        | 2.42 (1.03,5.68)        |
| p-trend                      |                         |                              | 0.02                    |
| <b>ORGANOPHOSPHATES</b>      |                         |                              |                         |
| <b>Chlorpyrifos</b>          |                         |                              |                         |
| Never                        | 14678 (57)              | 111 (52)                     | Reference               |
| T1                           | 3756 (15)               | 34 (16)                      | 1.27 (0.86,1.88)        |
| T2                           | 3727 (15)               | 37 (17)                      | 1.42 (0.97,2.06)        |
| T3                           | 3602 (14)               | 32 (15)                      | 1.25 (0.84,1.86)        |
| p-trend                      |                         |                              | 0.09                    |
| <b>Dichlorvos</b>            |                         |                              |                         |
| Never                        | 21220 (88)              | 170 (87)                     | Reference               |
| T1                           | 1052 (4)                | 9 (5)                        | 1.33 (0.67,2.63)        |
| T2                           | 936 (4)                 | 7 (4)                        | 1.14 (0.53,2.44)        |
| T3                           | 796 (3)                 | 9 (5)                        | 1.76 (0.87,3.48)        |
| p-trend                      |                         |                              | 0.11                    |
| <b>Fonofos</b>               |                         |                              |                         |
| Never                        | 18544 (77)              | 141 (71)                     | Reference               |

|                             |            |          |                  |
|-----------------------------|------------|----------|------------------|
| <b>T1</b>                   | 1825 (8)   | 24 (12)  | 2.27 (1.44,3.57) |
| <b>T2</b>                   | 2074 (9)   | 12 (6)   | 0.98 (0.54,1.80) |
| <b>T3</b>                   | 1725 (7)   | 22 (11)  | 2.10 (1.32,3.36) |
| <b>p-trend</b>              |            |          | 0.005            |
| <b>Terbufos</b>             |            |          |                  |
| <b>Never</b>                | 14178 (59) | 116 (58) | Reference        |
| <b>T1</b>                   | 3548 (15)  | 27 (14)  | 1.14 (0.74,1.75) |
| <b>T2</b>                   | 3464 (14)  | 29 (15)  | 1.25 (0.82,1.89) |
| <b>T3</b>                   | 2954 (12)  | 28 (14)  | 1.33 (0.88,2.03) |
| <b>p-trend</b>              |            |          | 0.12             |
| <b>CARBAMATES</b>           |            |          |                  |
| <b>Carbaryl<sup>b</sup></b> |            |          |                  |
| <b>Never</b>                | 7966 (59)  | 55 (44)  | Reference        |
| <b>T1</b>                   | 2339 (17)  | 23 (18)  | 1.33 (0.81,2.18) |
| <b>T2</b>                   | 1775 (13)  | 25 (20)  | 1.62 (0.96,2.71) |
| <b>T3</b>                   | 1434 (11)  | 23 (18)  | 1.61 (0.90,2.86) |
| <b>p-trend</b>              |            |          | 0.05             |
| <b>HERBICIDES</b>           |            |          |                  |
| <b>Alachlor</b>             |            |          |                  |
| <b>Never</b>                | 10698 (45) | 80 (40)  | Reference        |
| <b>T1</b>                   | 5931 (25)  | 50 (25)  | 1.25 (0.87,1.79) |
| <b>T2</b>                   | 3001 (13)  | 24 (12)  | 1.17 (0.74,1.86) |
| <b>T3</b>                   | 4362 (18)  | 44 (22)  | 1.37 (0.94,1.98) |
| <b>p-trend</b>              |            |          | 0.11             |
| <b>Atrazine</b>             |            |          |                  |
| <b>Never</b>                | 6685 (26)  | 52 (24)  | Reference        |
| <b>T1</b>                   | 8199 (32)  | 60 (28)  | 1.10 (0.75,1.62) |
| <b>T2</b>                   | 6002 (23)  | 49 (23)  | 1.28 (0.85,1.91) |
| <b>T3</b>                   | 4914 (19)  | 54 (25)  | 1.62 (1.09,2.40) |
| <b>p-trend</b>              |            |          | 0.01             |
| <b>Chlorimuron ethyl</b>    |            |          |                  |
| <b>Never</b>                | 9217 (68)  | 81 (63)  | Reference        |
| <b>T1</b>                   | 1116 (8)   | 12 (9)   | 1.47 (0.79,2.72) |
| <b>T2</b>                   | 1881 (14)  | 20 (16)  | 1.34 (0.82,2.21) |
| <b>T3</b>                   | 1397 (10)  | 16 (12)  | 1.42 (0.83,2.45) |
| <b>p-trend</b>              |            |          | 0.10             |
| <b>Imazethapyr</b>          |            |          |                  |
| <b>Never</b>                | 12842 (54) | 111 (57) | Reference        |
| <b>T1</b>                   | 4910 (21)  | 50 (26)  | 1.74 (1.18,2.55) |
| <b>T2</b>                   | 599 (3)    | 5 (3)    | 1.42 (0.56,3.59) |
| <b>T3</b>                   | 5582 (23)  | 30 (15)  | 0.97 (0.62,1.52) |
| <b>p-trend</b>              |            |          | 0.82             |
| <b>Trifluralin</b>          |            |          |                  |

|                       |            |          |                  |
|-----------------------|------------|----------|------------------|
| <b>Never</b>          | 10781 (45) | 89 (45)  | Reference        |
| <b>T1</b>             | 4520 (19)  | 35 (18)  | 1.11 (0.75,1.66) |
| <b>T2</b>             | 3572 (15)  | 31 (16)  | 1.34 (0.87,2.06) |
| <b>T3</b>             | 5204 (22)  | 43 (22)  | 1.25 (0.85,1.84) |
| <b>p-trend</b>        |            |          | 0.18             |
| <b>FUNGICIDES</b>     |            |          |                  |
| <b>Chlorothalonil</b> |            |          |                  |
| <b>Never</b>          | 24052 (93) | 194 (91) | Reference        |
| <b>T1</b>             | 862 (3)    | 7 (3)    | 0.82 (0.38,1.77) |
| <b>T2</b>             | 572 (2)    | 6 (3)    | 1.02 (0.44,2.35) |
| <b>T3</b>             | 304 (1)    | 7 (3)    | 2.35 (1.07,5.14) |
| <b>p-trend</b>        |            |          | 0.18             |
| <b>Metalaxyl</b>      |            |          |                  |
| <b>Never</b>          | 11164 (83) | 96 (74)  | Reference        |
| <b>T1</b>             | 714 (5)    | 7 (5)    | 1.05 (0.48,2.28) |
| <b>T2</b>             | 991 (7)    | 14 (11)  | 1.20 (0.64,2.23) |
| <b>T3</b>             | 616 (5)    | 13 (10)  | 1.76 (0.91,3.41) |
| <b>p-trend</b>        |            |          | 0.13             |
| <b>OTHERS</b>         |            |          |                  |
| <b>Methyl bromide</b> |            |          |                  |
| <b>Never</b>          | 22116 (86) | 166 (76) | Reference        |
| <b>T1</b>             | 1004 (4)   | 16 (7)   | 1.74 (1.00,3.02) |
| <b>T2</b>             | 1469 (6)   | 17 (8)   | 1.18 (0.68,2.05) |
| <b>T3</b>             | 1203 (5)   | 19 (9)   | 1.54 (0.90,2.63) |
| <b>p-trend</b>        |            |          | 0.11             |

<sup>a</sup>Adjusted for age, state of enrollment, pack-years smoking, and education

<sup>b</sup>From take-home questionnaire

<sup>c</sup>Tertiles (T1, T2, T3) based on intensity-weighted lifetime days of use.

**Table S2 - Ever use of specific pesticides and incident RA among smokers and non-smokers male licensed pesticide applicators in the Agricultural Health Study**

|                           | Non,smokers |                |                         | Smokers   |                |                         |
|---------------------------|-------------|----------------|-------------------------|-----------|----------------|-------------------------|
|                           | Non-cases   | Incident cases | OR <sup>a</sup> (95%CI) | Non-cases | Incident cases | OR <sup>a</sup> (95%CI) |
|                           | N=15046     | N=100          |                         | N=11088   | N=120          |                         |
|                           | N (%)       | N (%)          |                         | N (%)     | N (%)          |                         |
| <b>INSECTICIDES</b>       |             |                |                         |           |                |                         |
| <b>ORGANOCHLORINES</b>    |             |                |                         |           |                |                         |
|                           | 7364 (50)   | 61 (62)        | 1.37 (0.88,2.15)        | 6533 (62) | 72 (63)        | 0.99 (0.65,1.49)        |
| Aldrin                    | 1230 (15)   | 13 (25)        | 1.80 (0.96,3.37)        | 1140 (20) | 16 (21)        | 1.25 (0.69,2.29)        |
| Chlordane                 | 1305 (16)   | 17 (31)        | 2.37 (1.33,4.23)        | 1285 (23) | 19 (25)        | 1.05 (0.61,1.80)        |
| DDT                       | 1387 (17)   | 18 (33)        | 2.41 (1.36,4.25)        | 1533 (27) | 22 (29)        | 0.92 (0.53,1.59)        |
| Dieldrin                  | 258 (3)     | 7 (13)         | 4.48 (2.01,10.01)       | 233 (4)   | 1 (1)          | 0.35 (0.05,2.56)        |
| Heptachlor                | 943 (12)    | 8 (15)         | 1.34 (0.63,2.85)        | 780 (14)  | 7 (9)          | 0.74 (0.32,1.68)        |
| Lindane                   | 1176 (15)   | 10 (19)        | 1.32 (0.66,2.63)        | 830 (15)  | 8 (11)         | 0.75 (0.36,1.59)        |
| Toxaphene                 | 765 (10)    | 10 (19)        | 2.21 (1.11,4.42)        | 722 (13)  | 13 (18)        | 1.26 (0.68,2.35)        |
| <b>ORGANOPHOSPHATES</b>   |             |                |                         |           |                |                         |
|                           | 13571 (90)  | 96 (96)        | NC                      | 9927 (90) | 107 (89)       | 1.20 (0.66,2.16)        |
| Chlorpyrifos              | 6577 (44)   | 53 (54)        | 1.47 (0.99,2.18)        | 4684 (43) | 51 (44)        | 1.13 (0.78,1.64)        |
| Coumaphos                 | 1368 (10)   | 6 (6)          | 0.63 (0.27,1.44)        | 891 (9)   | 7 (7)          | 0.81 (0.38,1.76)        |
| Diazinon                  | 1421 (18)   | 12 (23)        | 1.39 (0.73,2.66)        | 1370 (25) | 22 (29)        | 1.13 (0.67,1.90)        |
| Dichlorvos                | 1784 (13)   | 16 (17)        | 1.40 (0.82,2.40)        | 1071 (11) | 10 (10)        | 1.22 (0.62,2.38)        |
| Fonofos                   | 3447 (24)   | 29 (30)        | 1.34 (0.86,2.07)        | 2292 (23) | 29 (28)        | 1.94 (1.21,3.13)        |
| Malathion                 | 5181 (64)   | 33 (61)        | 0.88 (0.51,1.52)        | 3802 (68) | 54 (71)        | 1.27 (0.77,2.12)        |
| Parathion                 | 510 (6)     | 4 (7)          | 1.18 (0.42,3.27)        | 512 (9)   | 7 (9)          | 0.79 (0.36,1.77)        |
| Phorate                   | 2626 (33)   | 20 (37)        | 1.22 (0.70,2.12)        | 1719 (31) | 20 (27)        | 1.03 (0.59,1.79)        |
| Terbufos                  | 6230 (44)   | 43 (44)        | 1.01 (0.68,1.51)        | 3939 (39) | 43 (41)        | 1.37 (0.91,2.06)        |
| <b>CARBAMATES</b>         |             |                |                         |           |                |                         |
|                           | 9485 (64)   | 72 (72)        | 1.25 (0.79,1.99)        | 7817 (73) | 91 (78)        | 1.16 (0.73,1.84)        |
| Aldicarb                  | 454 (6)     | 3 (6)          | 0.98 (0.31,3.16)        | 496 (9)   | 10 (14)        | 1.19 (0.57,2.45)        |
| Carbaryl                  | 3011 (37)   | 25 (47)        | 1.50 (0.87,2.57)        | 2697 (48) | 49 (64)        | 1.74 (1.03,2.92)        |
| Carbofuran                | 4007 (28)   | 24 (25)        | 0.85 (0.54,1.36)        | 3059 (31) | 39 (38)        | 1.40 (0.94,2.09)        |
| <b>PYRETHROIDS</b>        |             |                |                         |           |                |                         |
|                           | 3877 (28)   | 24 (26)        | 0.98 (0.61,1.57)        | 2360 (24) | 28 (29)        | 1.46 (0.93,2.28)        |
| Permethrin C <sup>b</sup> | 1966 (14)   | 12 (13)        | 0.91 (0.50,1.67)        | 1386 (14) | 19 (19)        | 1.40 (0.84,2.33)        |
| Permethrin P <sup>b</sup> | 2395 (17)   | 15 (15)        | 0.90 (0.52,1.57)        | 1242 (12) | 10 (10)        | 1.07 (0.55,2.09)        |

| <b>HERBICIDES</b>                |            |         |                  |           |         |                  |
|----------------------------------|------------|---------|------------------|-----------|---------|------------------|
| <b>2,4-D</b>                     | 11894 (80) | 85 (86) | 1.55 (0.88,2.73) | 8542 (78) | 84 (73) | 0.93 (0.60,1.44) |
| <b>2,4,5-T</b>                   | 1418 (18)  | 17 (31) | 2.10 (1.18,3.72) | 1194 (21) | 12 (16) | 0.74 (0.39,1.41) |
| <b>2,4,5-TP</b>                  | 360 (4)    | 5 (9)   | 2.13 (0.84,5.37) | 315 (6)   | 2 (3)   | 0.47 (0.12,1.95) |
| <b>Alachlor</b>                  | 7989 (56)  | 60 (64) | 1.38 (0.91,2.11) | 5706 (56) | 62 (57) | 1.14 (0.77,1.68) |
| <b>Atrazine</b>                  | 11346 (76) | 81 (83) | 1.52 (0.90,2.57) | 7974 (72) | 85 (71) | 1.09 (0.72,1.64) |
| <b>Butylate</b>                  | 2372 (29)  | 16 (29) | 0.99 (0.55,1.77) | 1540 (28) | 19 (25) | 1.04 (0.61,1.78) |
| <b>Chlorimuron_ethyl</b>         | 2645 (33)  | 24 (44) | 1.59 (0.93,2.72) | 1825 (33) | 27 (35) | 1.23 (0.76,1.98) |
| <b>Cyanazine</b>                 | 6677 (47)  | 39 (41) | 0.80 (0.53,1.21) | 4283 (42) | 37 (35) | 1.02 (0.65,1.60) |
| <b>Dicamba</b>                   | 8297 (58)  | 51 (55) | 0.87 (0.57,1.30) | 5105 (51) | 41 (38) | 0.80 (0.50,1.27) |
| <b>EPTC</b>                      | 3210 (23)  | 12 (13) | 0.51 (0.28,0.93) | 1971 (20) | 12 (12) | 0.68 (0.36,1.27) |
| <b>Glyphosate</b>                | 11353 (76) | 75 (75) | 0.96 (0.61,1.51) | 8707 (79) | 91 (77) | 0.88 (0.57,1.37) |
| <b>Imazethapyr</b>               | 7034 (50)  | 47 (51) | 1.04 (0.69,1.56) | 4258 (43) | 39 (38) | 1.27 (0.77,2.09) |
| <b>Metolachlor</b>               | 7179 (50)  | 47 (50) | 0.99 (0.66,1.48) | 4730 (47) | 38 (36) | 0.74 (0.49,1.12) |
| <b>Metribuzin</b>                | 3378 (42)  | 24 (44) | 1.08 (0.63,1.84) | 2128 (38) | 24 (32) | 0.98 (0.58,1.67) |
| <b>Paraquat</b>                  | 1116 (14)  | 9 (17)  | 1.25 (0.61,2.56) | 1015 (18) | 15 (19) | 0.85 (0.47,1.56) |
| <b>Pendimethalin</b>             | 2995 (37)  | 20 (36) | 0.97 (0.56,1.69) | 2188 (39) | 29 (38) | 0.93 (0.58,1.49) |
| <b>Trifluralin</b>               | 8097 (57)  | 57 (59) | 1.09 (0.73,1.63) | 5493 (54) | 55 (53) | 1.25 (0.83,1.90) |
| <b>FUNGICIDES</b>                |            |         |                  |           |         |                  |
| <b>Benomyl</b>                   | 484 (6)    | 1 (2)   | 0.29 (0.04,2.13) | 495 (9)   | 8 (10)  | 0.89 (0.41,1.92) |
| <b>Captan</b>                    | 1752 (12)  | 13 (14) | 1.12 (0.62,2.01) | 1181 (12) | 8 (8)   | 0.68 (0.33,1.42) |
| <b>Chlorothalonil</b>            | 895 (6)    | 11 (11) | 1.96 (1.05,3.69) | 966 (9)   | 13 (11) | 1.04 (0.56,1.90) |
| <b>Maneb</b>                     | 491 (6)    | 3 (5)   | 0.89 (0.28,2.85) | 540 (10)  | 11 (15) | 1.19 (0.59,2.39) |
| <b>Metalaxyl</b>                 | 1184 (15)  | 9 (16)  | 1.14 (0.55,2.33) | 1327 (24) | 26 (34) | 1.33 (0.76,2.32) |
| <b>OTHERS</b>                    |            |         |                  |           |         |                  |
| <b>80/20_mix</b>                 | 300 (4)    | 3 (6)   | 1.52 (0.47,4.89) | 295 (5)   | 2 (3)   | 0.51 (0.12,2.12) |
| <b>Methylbromide</b>             | 1642 (11)  | 15 (15) | 1.45 (0.83,2.51) | 2183 (20) | 38 (32) | 1.57 (0.98,2.53) |
| <b>Petroleum_oil</b>             | 1801 (22)  | 9 (16)  | 0.68 (0.33,1.39) | 1227 (22) | 10 (13) | 0.61 (0.31,1.19) |
| <b>No. of pesticides applied</b> |            |         |                  |           |         |                  |
| <b>0 – 5</b>                     | 3042 (20)  | 16 (16) | Reference        | 2699 (24) | 28 (23) | Reference        |
| <b>6 – 9</b>                     | 4425 (30)  | 27 (27) | 1.30 (0.69,2.44) | 3095 (28) | 41 (34) | 1.51 (0.92,2.49) |
| <b>10 – 13</b>                   | 3740 (25)  | 26 (26) | 1.53 (0.80,2.92) | 2534 (23) | 21 (18) | 1.04 (0.58,1.87) |
| <b>14+</b>                       | 3768 (25)  | 30 (30) | 1.67 (0.89,3.16) | 2726 (25) | 30 (25) | 1.44 (0.83,2.47) |



NC = not calculated due to fewer than 5 exposed or unexposed cases

<sup>a</sup>Adjusted for age, state of enrollment, pack-years smoking, and education

<sup>b</sup> Permethrin C: used on crops; Permethrin P: used on poultry and livestock

**Table S3 – Ever use of specific pesticides and incident RA among male licensed pesticide applicators in the Agricultural Health Study, according to age**

|                         | Age < 50             |                      |                         | Age >= 50            |                      |                         |
|-------------------------|----------------------|----------------------|-------------------------|----------------------|----------------------|-------------------------|
|                         | Non-cases<br>N=15814 | Incident RA<br>N=111 | OR <sup>a</sup> (95%CI) | Non-cases<br>N=10320 | Incident RA<br>N=109 | OR <sup>a</sup> (95%CI) |
|                         | N (%)                | N (%)                |                         | N (%)                | N (%)                |                         |
| <b>INSECTICIDES</b>     |                      |                      |                         |                      |                      |                         |
| <b>ORGANOCHLORINES</b>  | 6340 (41)            | 52 (48)              | 1.03 (0.69,1.54)        | 7557 (77)            | 81 (77)              | 1.13 (0.71,1.80)        |
| <b>Aldrin</b>           | 490 (6.3)            | 4 (7.0)              | 0.81 (0.29,2.30)        | 1880 (32.4)          | 25 (35.2)            | 1.38 (0.82,2.35)        |
| <b>Chlordane</b>        | 947 (12.1)           | 15 (26.3)            | 1.82 (0.97,3.39)        | 1643 (28.4)          | 21 (29.2)            | 1.01 (0.60,1.71)        |
| <b>DDT</b>              | 455 (5.8)            | 8 (13.8)             | 1.15 (0.51,2.59)        | 2465 (42.3)          | 32 (44.4)            | 1.15 (0.71,1.87)        |
| <b>Dieldrin</b>         | 61 (0.8)             | 0 (0.0)              | NC                      | 430 (7.5)            | 8 (11.3)             | 1.91 (0.89,4.11)        |
| <b>Heptachlor</b>       | 443 (5.7)            | 1 (1.8)              | 0.28 (0.04,2.01)        | 1280 (22.0)          | 14 (19.7)            | 0.99 (0.53,1.85)        |
| <b>Lindane</b>          | 1006 (12.9)          | 7 (11.9)             | 0.91 (0.41,2.03)        | 1000 (17.3)          | 11 (15.5)            | 0.95 (0.49,1.83)        |
| <b>Toxaphene</b>        | 558 (7.1)            | 8 (14.0)             | 1.35 (0.62,2.95)        | 929 (16.0)           | 15 (21.4)            | 1.40 (0.78,2.51)        |
| <b>ORGANOPHOSPHATES</b> | 14323 (91)           | 104 (94)             | 1.67 (0.77,3.63)        | 9175 (89)            | 99 (91)              | 1.42 (0.73,2.77)        |
| <b>Chlorpyrifos</b>     | 7148 (45.4)          | 54 (50.0)            | 1.21 (0.83,1.77)        | 4113 (40.3)          | 50 (46.7)            | 1.34 (0.91,1.97)        |
| <b>Coumaphos</b>        | 1329 (9.0)           | 5 (5.0)              | 0.52 (0.21,1.28)        | 930 (10.3)           | 8 (8.6)              | 0.87 (0.42,1.81)        |
| <b>Diazinon</b>         | 1421 (18.2)          | 18 (31.0)            | 1.42 (0.78,2.61)        | 1370 (23.7)          | 16 (22.9)            | 0.91 (0.51,1.62)        |
| <b>Dichlorvos</b>       | 1731 (11.6)          | 10 (9.7)             | 0.94 (0.48,1.83)        | 1124 (12.3)          | 16 (17.2)            | 1.82 (1.04,3.20)        |
| <b>Fonofos</b>          | 3469 (23.0)          | 29 (28.2)            | 1.56 (0.99,2.47)        | 2270 (24.7)          | 29 (30.2)            | 1.76 (1.09,2.87)        |
| <b>Malathion</b>        | 5015 (64.0)          | 33 (55.9)            | 0.69 (0.41,1.16)        | 3968 (67.9)          | 54 (76.1)            | 1.55 (0.89,2.69)        |
| <b>Parathion</b>        | 471 (6.1)            | 3 (5.1)              | NC                      | 551 (9.6)            | 8 (11.3)             | 1.06 (0.50,2.28)        |
| <b>Phorate</b>          | 2251 (28.7)          | 15 (25.9)            | 0.99 (0.53,1.84)        | 2094 (36.1)          | 25 (35.2)            | 1.15 (0.67,1.96)        |
| <b>Terbufos</b>         | 6477 (42.9)          | 42 (40.2)            | 1.03 (0.67,1.54)        | 3692 (40.0)          | 44 (44.9)            | 1.48 (0.97,2.26)        |
| <b>CARBAMATES</b>       | 9919 (64)            | 81 (74)              | 1.22 (0.77,1.93)        | 7383 (74)            | 82 (77)              | 1.09 (0.68,1.74)        |
| <b>Aldicarb</b>         | 593 (7.6)            | 7 (12.1)             | 0.94 (0.40,2.24)        | 357 (6.2)            | 6 (8.6)              | 1.12 (0.46,2.77)        |
| <b>Carbaryl</b>         | 2892 (36.9)          | 32 (55.2)            | 1.44 (0.81,2.59)        | 2816 (48.2)          | 42 (59.2)            | 1.50 (0.89,2.52)        |
| <b>Carbofuran</b>       | 3869 (25.8)          | 30 (29.4)            | 1.05 (0.68,1.62)        | 3197 (34.9)          | 33 (34.4)            | 1.03 (0.67,1.58)        |
| <b>PYRETHROIDS</b>      | 12505 (79)           | 80 (72)              | 0.76 (0.49,1.17)        | 8518 (83)            | 95 (87)              | 1.74 (0.97,3.13)        |

|                                  |              |           |                  |             |           |                  |
|----------------------------------|--------------|-----------|------------------|-------------|-----------|------------------|
| <b>Permethrin C<sup>b</sup></b>  | 2332 (15.7)  | 18 (17.7) | 1.09 (0.65,1.82) | 1020 (11.3) | 13 (14.1) | 1.24 (0.69,2.25) |
| <b>Permethrin P<sup>b</sup></b>  | 2710 (18.0)  | 13 (12.5) | 0.78 (0.43,1.42) | 927 (10.1)  | 12 (12.8) | 1.51 (0.81,2.83) |
| <b>HERBICIDES</b>                | 15497 (98)   | 107 (96)  | 0.52 (0.19,1.42) | 10090 (98)  | 106 (97)  | 0.89 (0.28,2.87) |
| <b>2,4-D</b>                     | 12219 (77.7) | 78 (72.9) | 0.86 (0.55,1.35) | 8217 (80.6) | 91 (85.1) | 1.66 (0.95,2.89) |
| <b>2,4,5-T</b>                   | 947 (12.1)   | 9 (15.3)  | 1.16 (0.56,2.39) | 1665 (28.5) | 20 (28.6) | 1.08 (0.63,1.83) |
| <b>Alachlor</b>                  | 8236 (54.7)  | 58 (55.2) | 1.01 (0.68,1.49) | 5459 (58.4) | 64 (66.0) | 1.51 (0.99,2.33) |
| <b>Atrazine</b>                  | 11707 (74.3) | 86 (77.5) | 1.35 (0.85,2.15) | 7613 (74.2) | 80 (74.8) | 1.12 (0.71,1.78) |
| <b>Butylate</b>                  | 2254 (28.8)  | 11 (18.3) | 0.57 (0.29,1.11) | 1658 (28.4) | 24 (33.3) | 1.41 (0.85,2.35) |
| <b>Chlorimuron ethyl</b>         | 2846 (36.4)  | 20 (33.3) | 0.93 (0.54,1.61) | 1624 (27.7) | 31 (43.1) | 2.04 (1.27,3.27) |
| <b>Cyanazine</b>                 | 6810 (45.2)  | 31 (30.1) | 0.57 (0.37,0.93) | 4150 (44.8) | 45 (46.9) | 1.49 (0.94,2.37) |
| <b>Dicamba</b>                   | 8510 (56.7)  | 42 (41.2) | 0.62 (0.39,0.98) | 4885 (52.9) | 50 (51.0) | 1.26 (0.78,2.02) |
| <b>EPTC</b>                      | 3445 (23.1)  | 10 (9.6)  | 0.41 (0.21,0.79) | 1736 (19.1) | 14 (15.4) | 0.93 (0.51,1.67) |
| <b>Glyphosate</b>                | 12344 (78.3) | 85 (77.3) | 0.82 (0.52,1.31) | 7716 (75.3) | 81 (75.0) | 0.96 (0.61,1.50) |
| <b>Imazethapyr</b>               | 7593 (50.6)  | 43 (42.2) | 0.99 (0.62,1.58) | 3699 (40.5) | 43 (45.3) | 1.85 (1.11,3.05) |
| <b>Metholachlor</b>              | 7685 (50.9)  | 42 (40.4) | 0.73 (0.49,1.09) | 4224 (45.6) | 43 (45.3) | 1.01 (0.72,1.66) |
| <b>Metribuzin</b>                | 3219 (41.1)  | 15 (25.4) | 0.53 (0.29,1.00) | 2287 (39.2) | 33 (45.8) | 1.65 (0.98,2.76) |
| <b>Paraquat</b>                  | 1201 (15.3)  | 11 (18.3) | 0.73 (0.36,1.50) | 930 (15.9)  | 13 (18.3) | 1.02 (0.53,1.95) |
| <b>Pendimethalin</b>             | 3172 (40.5)  | 21 (35.0) | 0.78 (0.46,1.33) | 2011 (34.3) | 28 (38.9) | 1.19 (0.74,1.93) |
| <b>Trifluralin</b>               | 8434 (55.8)  | 54 (52.4) | 1.04 (0.69,1.58) | 5156 (55.7) | 58 (59.2) | 1.43 (0.93,2.21) |
| <b>FUNGICIDES</b>                | 5541 (35)    | 48 (43)   | 1.04 (0.67,1.60) | 3771 (37)   | 43 (39)   | 1.00 (0.65,1.54) |
| <b>Benomyl</b>                   | 508 (6.5)    | 3 (5.1)   | 0.40 (0.12,1.31) | 471 (8.1)   | 6 (8.3)   | 0.85 (0.35,2.06) |
| <b>Captan</b>                    | 1891 (12.7)  | 12 (11.5) | 0.90 (0.50,1.65) | 1042 (11.4) | 9 (9.8)   | 0.90 (0.45,1.80) |
| <b>Chlorothalonil</b>            | 1132 (7.2)   | 13 (11.8) | 1.25 (0.67,2.33) | 729 (7.1)   | 11 (10.2) | 1.30 (0.67,2.53) |
| <b>Maneb</b>                     | 495 (6.3)    | 6 (10.3)  | 0.96 (0.39,2.39) | 536 (9.2)   | 8 (11.1)  | 0.97 (0.43,2.17) |
| <b>Metalaxyl</b>                 | 1411 (18.0)  | 16 (27.1) | 1.00 (0.51,1.96) | 1100 (18.9) | 19 (26.4) | 1.35 (0.74,2.44) |
| <b>OTHERS</b>                    |              |           |                  |             |           |                  |
| <b>80/20 Mix</b>                 | 182 (2.3)    | 0 (0.0)   | ...              | 413 (7.1)   | 5 (6.9)   | 1.06 (0.42,2.67) |
| <b>Methylbromide</b>             | 2166 (13.8)  | 26 (23.4) | 1.21 (0.70,2.09) | 1659 (16.2) | 27 (25.0) | 1.61 (0.94,2.75) |
| <b>Petroleum oil</b>             | 1840 (23.6)  | 11 (18.3) | 0.77 (0.40,1.50) | 1188 (20.5) | 8 (11.1)  | 0.51 (0.24,1.07) |
| <b>No. of pesticides applied</b> |              |           |                  |             |           |                  |
| <b>0 – 5</b>                     | 3386 (22)    | 25 (23)   | Reference        | 2355 (23)   | 19 (18)   | Reference        |
| <b>6 – 9</b>                     | 4745 (30)    | 42 (38)   | 1.37 (0.82,2.28) | 2775 (27)   | 26 (24)   | 1.36 (0.74,2.50) |

|                |           |         |                  |           |         |                  |
|----------------|-----------|---------|------------------|-----------|---------|------------------|
| <b>10 – 13</b> | 3994 (25) | 21 (19) | 0.86 (0.47,1.57) | 2280 (22) | 26 (24) | 1.79 (0.96,3.33) |
| <b>14+</b>     | 3617 (23) | 23 (21) | 0.99 (0.55,1.78) | 2877 (28) | 37 (34) | 2.16 (1.19,3.90) |

NC = not calculated due to fewer than 5 exposed or unexposed cases

<sup>a</sup>Adjusted for age, state of enrollment, pack-years smoking, and education

<sup>b</sup>Permethrin C: used on crops; Permethrin P: used on poultry and livestock

**Table S4 – Main characteristic of probable and possible RA cases and non-cases among male licensed private applicators in the Agricultural Health Study**

|                                           | <b>Non-cases<br/>(N=26,134)<br/>N (%)</b> | <b>Probable + Possible Incident RA cases<br/>(N=380)<br/>N (%)</b> | <b>OR<sup>a</sup> (95%CI)</b> |
|-------------------------------------------|-------------------------------------------|--------------------------------------------------------------------|-------------------------------|
| <b>Age at enrollment (years)</b>          |                                           |                                                                    |                               |
| <40                                       | 7858 (30)                                 | 54 (14)                                                            | Reference                     |
| 40-49                                     | 7956 (30)                                 | 118 (31)                                                           | 2.16 (1.56,2.98)              |
| 50-59                                     | 6035 (23)                                 | 122 (32)                                                           | 2.94 (2.13,4.06)              |
| 60+                                       | 4285 (16)                                 | 86 (23)                                                            | 2.92 (2.07,4.11)              |
| <b>Body Mass Index (Kg/m<sup>2</sup>)</b> |                                           |                                                                    |                               |
| < 25                                      | 6157 (26)                                 | 62 (17)                                                            | Reference                     |
| 25 to <30                                 | 12353 (51)                                | 193 (54)                                                           | 1.51 (1.13,2.01)              |
| ≥ 30                                      | 5551 (23)                                 | 101 (28)                                                           | 1.79 (1.30,2.47)              |
| <b>State of enrollment</b>                |                                           |                                                                    |                               |
| Iowa                                      | 17972 (69)                                | 209 (55)                                                           | Reference                     |
| North Carolina                            | 8162 (31)                                 | 171 (45)                                                           | 1.66 (1.35,2.04)              |
| <b>Race</b>                               |                                           |                                                                    |                               |
| White                                     | 25454 (97)                                | 359 (95)                                                           | Reference                     |
| Non-white                                 | 659 (3)                                   | 20 (5)                                                             | 2.01 (1.27,3.17)              |
| <b>Education</b>                          |                                           |                                                                    |                               |
| High school or less                       | 14117 (54)                                | 250 (66)                                                           | Reference                     |
| > high school                             | 12017 (46)                                | 130 (34)                                                           | 0.70 (0.56,0.87)              |
| <b>Smoking status at enrollment</b>       |                                           |                                                                    |                               |
| Never Smoked                              | 15046 (58)                                | 171 (45)                                                           | Reference                     |
| Past Smoker                               | 7637 (29)                                 | 138 (36)                                                           | 1.33 (1.06,1.68)              |
| Current Smoker                            | 3392 (13)                                 | 70 (19)                                                            | 1.83 (1.38,2.42)              |
| <b>Pack-years of cigarette smoked</b>     |                                           |                                                                    |                               |
| None                                      | 15046 (58)                                | 172 (45)                                                           | Reference                     |
| <5                                        | 3460 (13)                                 | 44 (12)                                                            | 1.07 (0.76,1.49)              |
| 5-18                                      | 3760 (15)                                 | 69 (18)                                                            | 1.46 (1.10,1.93)              |
| > 18                                      | 3868 (15)                                 | 95 (25)                                                            | 1.80 (1.39,2.33)              |
| <b>Alcohol consumption (times/week)</b>   |                                           |                                                                    |                               |
| None                                      | 8143 (32)                                 | 143 (39)                                                           | Reference                     |
| ≤ 1                                       | 11778 (47)                                | 148 (40)                                                           | 0.84 (0.67,1.07)              |
| > 1                                       | 5331 (21)                                 | 77 (21)                                                            | 0.97 (0.73,1.29)              |

<sup>a</sup>Adjusted for continuous age

**Table S5 – Ever use of specific pesticides associated with possible and probable incident RA among male licensed pesticide applicators in the Agricultural Health Study**

|                           | Non-cases<br>(N=26,134)<br>N (%) | Probable + Possible Incident RA cases<br>(N=380)<br>N (%) | OR <sup>a</sup> (95%CI) |
|---------------------------|----------------------------------|-----------------------------------------------------------|-------------------------|
| <b>INSECTICIDES</b>       |                                  |                                                           |                         |
| <b>ORGANOCHLORINES</b>    | 13897 (55)                       | 241 (66)                                                  | 1.25 (0.98,1.58)        |
| Aldrin                    | 2370 (17)                        | 47 (22)                                                   | 1.23 (0.86,1.75)        |
| Chlordane                 | 2590 (19)                        | 54 (26)                                                   | 1.18 (0.85,1.64)        |
| DDT                       | 2920 (21)                        | 69 (32)                                                   | 1.23 (0.88,1.70)        |
| Dieldrin                  | 491 (4)                          | 10 (5)                                                    | 1.17 (0.61,2.27)        |
| Heptachlor                | 1723 (13)                        | 27 (13)                                                   | 0.97 (0.63,1.49)        |
| Lindane                   | 2006 (15)                        | 29 (14)                                                   | 0.95 (0.64,1.42)        |
| Toxaphene                 | 1487 (11)                        | 29 (14)                                                   | 1.03 (0.69,1.55)        |
| <b>ORGANOPHOSPHATES</b>   | 23498 (90)                       | 344 (91)                                                  | 1.32 (0.93,1.88)        |
| Chlorpyrifos              | 11261 (43)                       | 157 (42)                                                  | 1.03 (0.84,1.27)        |
| Coumaphos                 | 2259 (10)                        | 23 (7)                                                    | 0.71 (0.46,1.08)        |
| Diazinon                  | 2791 (21)                        | 52 (25)                                                   | 1.06 (0.76,1.48)        |
| Dichlorvos                | 2855 (12)                        | 38 (11)                                                   | 1.14 (0.80,1.61)        |
| Fonofos                   | 5739 (24)                        | 90 (26)                                                   | 1.44 (1.11,1.87)        |
| Malathion                 | 8983 (66)                        | 140 (65)                                                  | 0.99 (0.74,1.32)        |
| Parathion                 | 1022 (8)                         | 20 (9)                                                    | 0.96 (0.59,1.44)        |
| Phorate                   | 4345 (32)                        | 73 (35)                                                   | 1.34 (0.99,1.83)        |
| Terbufos                  | 10169 (42)                       | 140 (40)                                                  | 1.13 (0.91,1.42)        |
| <b>CARBAMATES</b>         | 17302 (68)                       | 254 (73)                                                  | 1.07 (0.83,1.38)        |
| Aldicarb                  | 950 (7)                          | 24 (11)                                                   | 1.26 (0.79,2.01)        |
| Carbaryl                  | 5708 (42)                        | 107 (50)                                                  | 1.09 (0.80,1.47)        |
| Carbofuran                | 7066 (29)                        | 117 (34)                                                  | 1.17 (0.93,1.46)        |
| <b>PYRETHROIDS</b>        | 6237 (26)                        | 61 (25)                                                   | 1.07 (0.89,1.44)        |
| Permethrin C <sup>b</sup> | 3352 (14)                        | 50 (15)                                                   | 1.11 (0.82,1.51)        |
| Permethrin P <sup>b</sup> | 3637 (15)                        | 36 (11)                                                   | 0.89 (0.62,1.27)        |
| <b>HERBICIDES</b>         |                                  |                                                           |                         |
| 2,4,D                     | 20436 (79)                       | 290 (78)                                                  | 1.09 (0.84,1.41)        |
| 2,4,5,T                   | 2612 (19)                        | 43 (20)                                                   | 0.96 (0.68,1.37)        |
| 2,4,5,TP                  | 675 (5)                          | 18 (9)                                                    | 1.65 (1.01,2.70)        |
| Alachlor                  | 13695 (56)                       | 205 (58)                                                  | 1.14 (0.92,1.42)        |
| Atrazine                  | 19320 (74)                       | 284 (75)                                                  | 1.25 (0.98,1.60)        |
| Butylate                  | 3912 (29)                        | 55 (26)                                                   | 0.99 (0.72,1.36)        |
| Chlorimuron ethyl         | 4470 (33)                        | 81 (38)                                                   | 1.39 (1.05,1.84)        |
| Cyanazine                 | 10960 (45)                       | 135 (39)                                                  | 1.00 (0.78,1.27)        |
| Dicamba                   | 13402 (55)                       | 155 (45)                                                  | 0.87 (0.67,1.11)        |
| EPTC                      | 5181 (22)                        | 50 (15)                                                   | 0.77 (0.57,1.06)        |
| Glyphosate                | 20060 (77)                       | 285 (76)                                                  | 0.90 (0.70,1.14)        |
| Imazethapyr               | 11292 (45)                       | 141 (41)                                                  | 1.20 (0.92,1.55)        |
| Metolachlor               | 11909 (49)                       | 158 (46)                                                  | 1.04 (0.83,1.29)        |
| Metribuzin                | 5506 (40)                        | 81 (38)                                                   | 1.15 (0.85,1.56)        |
| Paraquat                  | 2131 (16)                        | 42 (20)                                                   | 1.06 (0.73,1.53)        |

|                                  |            |          |                  |
|----------------------------------|------------|----------|------------------|
| <b>Pendimethalin</b>             | 5183 (38)  | 86 (40)  | 1.10 (0.83,1.45) |
| <b>Trifluralin</b>               | 13590 (56) | 182 (52) | 1.06 (0.85,1.33) |
| <b>FUNGICIDES</b>                |            |          |                  |
| <b>Benomyl</b>                   | 979 (7)    | 16 (8)   | 0.75 (0.44,1.28) |
| <b>Captan</b>                    | 2933 (12)  | 34 (10)  | 0.86 (0.60,1.22) |
| <b>Chlorothalonil</b>            | 1861 (7)   | 46 (12)  | 1.58 (1.05,2.06) |
| <b>Maneb</b>                     | 1031 (8)   | 18 (9)   | 0.75 (0.45,1.27) |
| <b>Metalaxyl</b>                 | 2511 (18)  | 56 (26)  | 1.17 (0.82,1.66) |
| <b>OTHERS</b>                    |            |          |                  |
| <b>80/20 Mix</b>                 | 595 (4)    | 8 (4)    | 0.76 (0.37,1.55) |
| <b>Methylbromide</b>             | 3825 (15)  | 85 (23)  | 1.19 (0.89,1.59) |
| <b>Petroleum oil</b>             | 3028 (22)  | 34 (16)  | 0.73 (0.51,1.06) |
| <b>No. of pesticides applied</b> |            |          |                  |
| <b>0 – 5</b>                     | 5741 (22)  | 86 (23)  | Reference        |
| <b>6 – 9</b>                     | 7520 (29)  | 106 (28) | 1.15 (0.86,1.54) |
| <b>10 – 13</b>                   | 6274 (24)  | 85 (23)  | 1.19 (0.87,1.64) |
| <b>14+</b>                       | 6494 (25)  | 100 (27) | 1.32 (0.97,1.80) |

<sup>a</sup> Adjusted for age, state of enrollment, pack-years smoking, and education

<sup>b</sup> Permethrin C: used on crops; Permethrin P: used on poultry and livestock

**Table S6 – Lifetime days of pesticide use in relation to probable + possible incident RA among male licensed pesticide applicators in the Agricultural Health Study**

|                              | <b>Non-cases<br/>(N=26,134)<br/>N (%)</b> | <b>Probable + Possible Incident RA Cases<br/>(N=380)<br/>N (%)</b> | <b>OR<sup>a</sup> (95%CI)</b> |
|------------------------------|-------------------------------------------|--------------------------------------------------------------------|-------------------------------|
| <b>INSECTICIDES</b>          |                                           |                                                                    |                               |
| <b>ORGANOCHLORINES</b>       |                                           |                                                                    |                               |
| <b>Aldrin</b>                |                                           |                                                                    |                               |
| Never                        | 11257 (83)                                | 164 (78)                                                           | Reference                     |
| < 20                         | 1095 (8)                                  | 21 (10)                                                            | 1.21 (0.75,1.96)              |
| >=20 to <24.5                | 116 (1)                                   | 13 (6)                                                             | 1.18 (0.65,2.12)              |
| >=24.5                       | 1084 (8)                                  | 11 (5)                                                             | 1.28 (0.68,2.41)              |
| <b>p-trend</b>               |                                           |                                                                    | 0.32                          |
| <b>Chlordane</b>             |                                           |                                                                    |                               |
| Never                        | 11035 (81)                                | 158 (75)                                                           | Reference                     |
| < 8.75                       | 639 (5)                                   | 12 (6)                                                             | 1.03 (0.56,1.88)              |
| >=8.75 to <20                | 1051 (8)                                  | 19 (9)                                                             | 1.08 (0.66,1.75)              |
| >=20                         | 825 (6)                                   | 22 (10)                                                            | 1.48 (0.93,2.34)              |
| <b>p-trend</b>               |                                           |                                                                    | 0.15                          |
| <b>Toxaphene<sup>b</sup></b> |                                           |                                                                    |                               |
| Never                        | 12143 (89)                                | 180 (87)                                                           | Reference                     |
| < 8.75                       | 859 (6)                                   | 4 (2)                                                              | 0.90 (0.33,2.46)              |
| >=8.75 to <38.75             | 392 (3)                                   | 10 (5)                                                             | 0.66 (0.34,1.25)              |
| >=38.75                      | 202 (1)                                   | 14 (7)                                                             | 1.87 (1.06,3.30)              |
| <b>p-trend</b>               |                                           |                                                                    | 0.47                          |
| <b>ORGANOPHOSPHATES</b>      |                                           |                                                                    |                               |
| <b>Chlorpyrifos</b>          |                                           |                                                                    |                               |
| Never                        | 14678 (57)                                | 216 (58)                                                           | Reference                     |
| < 14.5                       | 3756 (15)                                 | 47 (13)                                                            | 0.93 (0.68,1.28)              |
| >=14.5 to <56                | 3727 (15)                                 | 57 (15)                                                            | 1.14 (0.85,1.53)              |
| >=56                         | 3602 (14)                                 | 51 (14)                                                            | 1.05 (0.77,1.43)              |
| <b>p-trend</b>               |                                           |                                                                    | 0.54                          |
| <b>Dichlorvos</b>            |                                           |                                                                    |                               |
| Never                        | 21220 (88)                                | 304 (90)                                                           | Reference                     |
| < 20                         | 1052 (4)                                  | 9 (3)                                                              | 0.92 (0.47,1.80)              |
| >=20 to <116                 | 936 (4)                                   | 11 (3)                                                             | 0.96 (0.52,1.77)              |
| >=116                        | 796 (3)                                   | 15 (4)                                                             | 1.33 (0.79,2.26)              |
| <b>p-trend</b>               |                                           |                                                                    | 0.46                          |
| <b>Fonofos</b>               |                                           |                                                                    |                               |
| Never                        | 18544 (77)                                | 254 (74)                                                           | Reference                     |
| < 20                         | 1825 (8)                                  | 31 (9)                                                             | 1.62 (1.10,2.39)              |
| >=20 to <56                  | 2074 (9)                                  | 25 (7)                                                             | 1.12 (0.73,1.71)              |
| >=56                         | 1725 (7)                                  | 34 (10)                                                            | 1.76 (1.21,2.56)              |
| <b>p-trend</b>               |                                           |                                                                    | 0.005                         |
| <b>Terbufos</b>              |                                           |                                                                    |                               |
| Never                        | 14178 (59)                                | 208 (60)                                                           | Reference                     |
| < 24.5                       | 3548 (15)                                 | 48 (14)                                                            | 1.14 (0.83,1.58)              |
| >=24.5 to <63.75             | 3464 (14)                                 | 44 (13)                                                            | 1.07 (0.76,1.49)              |
| >=63.75                      | 2954 (12)                                 | 46 (13)                                                            | 1.24 (0.89,1.72)              |
| <b>p-trend</b>               |                                           |                                                                    | 0.22                          |
| <b>CARBAMATES</b>            |                                           |                                                                    |                               |
| <b>Carbaryl<sup>b</sup></b>  |                                           |                                                                    |                               |
| Never                        | 7966 (59)                                 | 106 (50)                                                           | Reference                     |
| < 14.5                       | 2339 (17)                                 | 31 (15)                                                            | 0.93 (0.62,1.39)              |
| >=14.5 to <56                | 1775 (13)                                 | 30 (14)                                                            | 1.25 (0.81,1.94)              |
| >=56                         | 1434 (11)                                 | 43 (20)                                                            | 1.18 (0.77,1.79)              |
| <b>p-trend</b>               |                                           |                                                                    | 0.36                          |



|                            |            |          |                  |
|----------------------------|------------|----------|------------------|
| <b>HERBICIDES</b>          |            |          |                  |
| <b>2,4,5-T<sup>b</sup></b> |            |          |                  |
| Never                      | 11038 (81) | 169 (81) | Reference        |
| < 8.75                     | 474 (3)    | 4 (2)    | 0.48 (0.18,1.32) |
| >=8.75 to <24.5            | 1555 (11)  | 18 (9)   | 0.93 (0.56,1.52) |
| >=24.5                     | 499 (4)    | 18 (9)   | 1.18 (0.72,1.95) |
| <b>p-trend</b>             |            |          | 0.84             |
| <b>Alachlor</b>            |            |          |                  |
| Never                      | 10698 (45) | 147 (43) | Reference        |
| < 24.5                     | 5931 (25)  | 50 (14)  | 0.92 (0.67,1.28) |
| >=24.5 to <108.5           | 3001 (13)  | 67 (19)  | 1.15 (0.85,1.54) |
| >=108.5                    | 4362 (18)  | 81 (23)  | 1.36 (1.03,1.79) |
| <b>p-trend</b>             |            |          | 0.03             |
| <b>Atrazine</b>            |            |          |                  |
| Never                      | 6685 (26)  | 93 (25)  | Reference        |
| < 29.5                     | 8199 (32)  | 85 (23)  | 1.16 (0.85,1.57) |
| >=29.5 to <116             | 6002 (23)  | 92 (25)  | 1.13 (0.84,1.52) |
| >=116                      | 4914 (19)  | 102 (27) | 1.51 (1.13,2.03) |
| <b>p-trend</b>             |            |          | 0.01             |
| <b>Imazethapyr</b>         |            |          |                  |
| Never                      | 12842 (54) | 203 (59) | Reference        |
| < 14.5                     | 4910 (21)  | 68 (20)  | 1.29 (0.95,1.76) |
| >=14.5 to <29.5            | 599 (3)    | 42 (12)  | 1.17 (0.81,1.69) |
| >=29.5                     | 5582 (23)  | 29 (8)   | 1.09 (0.72,1.65) |
| <b>p-trend</b>             |            |          | 0.49             |
| <b>Trifluralin</b>         |            |          |                  |
| Never                      | 10781 (45) | 167 (49) | Reference        |
| < 29.5                     | 4520 (19)  | 62 (18)  | 1.05 (0.78,1.42) |
| >=29.5 to <108.5           | 3572 (15)  | 44 (13)  | 1.01 (0.71,1.43) |
| >=108.5                    | 5204 (22)  | 71 (21)  | 1.11 (0.82,1.48) |
| <b>p-trend</b>             |            |          | 0.56             |
| <b>FUNGICIDES</b>          |            |          |                  |
| <b>Chlorothalonil</b>      |            |          |                  |
| Never                      | 24052 (93) | 327 (89) | Reference        |
| < 12.5                     | 862 (3)    | 11 (3)   | 1.09 (0.59,2.01) |
| >=12.5 to <87.5            | 572 (2)    | 14 (4)   | 1.50 (0.86,2.63) |
| >=87.5                     | 304 (1)    | 16 (4)   | 1.71 (1.01,2.89) |
| <b>p-trend</b>             |            |          | 0.02             |
| <b>Metalaxyl</b>           |            |          |                  |
| Never                      | 11164 (83) | 160 (74) | Reference        |
| < 12.25                    | 714 (5)    | 12 (6)   | 0.95 (0.52,1.72) |
| >=12.25 to <28             | 991 (7)    | 12 (6)   | 1.07 (0.58,2.00) |
| >=28                       | 616 (5)    | 31 (14)  | 1.70 (1.07,2.69) |
| <b>p-trend</b>             |            |          | 0.05             |
| <b>OTHERS</b>              |            |          |                  |
| <b>Methyl bromide</b>      |            |          |                  |
| Never                      | 22116 (86) | 292 (78) | Reference        |
| < 15.5                     | 1004 (4)   | 29 (8)   | 1.27 (0.84,1.92) |
| >=15.5 to <54.25           | 1469 (6)   | 20 (5)   | 0.91 (0.56,1.48) |
| >=54.25                    | 1203 (5)   | 35 (9)   | 1.49 (1.00,2.21) |
| <b>p-trend</b>             |            |          | 0.12             |

<sup>a</sup>Adjusted for age, state of enrollment, pack-years smoking, and education

<sup>b</sup>From take-home questionnaire
